# Supplementary material for: Sequential treatment of ADHD in mother and child (AIMAC study): importance of the treatment phases for intervention success in a randomized trial
Source: Springer Nature journal article supplement (doi:10.1186/s12888-018-1963-9), 2018-12-01
Supplement: MOESM1 [file 16340568]

**Supplement**

**Sequential treatment of ADHD in mother and child (AIMAC study):  
Importance of the treatment phases for intervention success  
in a randomized trial**

This supplement contains supporting information for the above-mentioned manuscript.

**Figure S1.** Study design of the AIMAC study (ADHD in Mothers and Children) including treatment of the mother and parent-child training for treatment group and control group families .....2

**Figure S2.** Multi-group analysis of piecewise latent growth curve models .....3

**Table S1.** Descriptive statistics of outcome measures before and after Step 1 (T1 to T2) mother treatment and Step 2 (T2 to T3) parent-child training.....4

**Table S2.** Results of the final multi-group analysis of piecewise linear latent growth models for unstandardized variables .....6

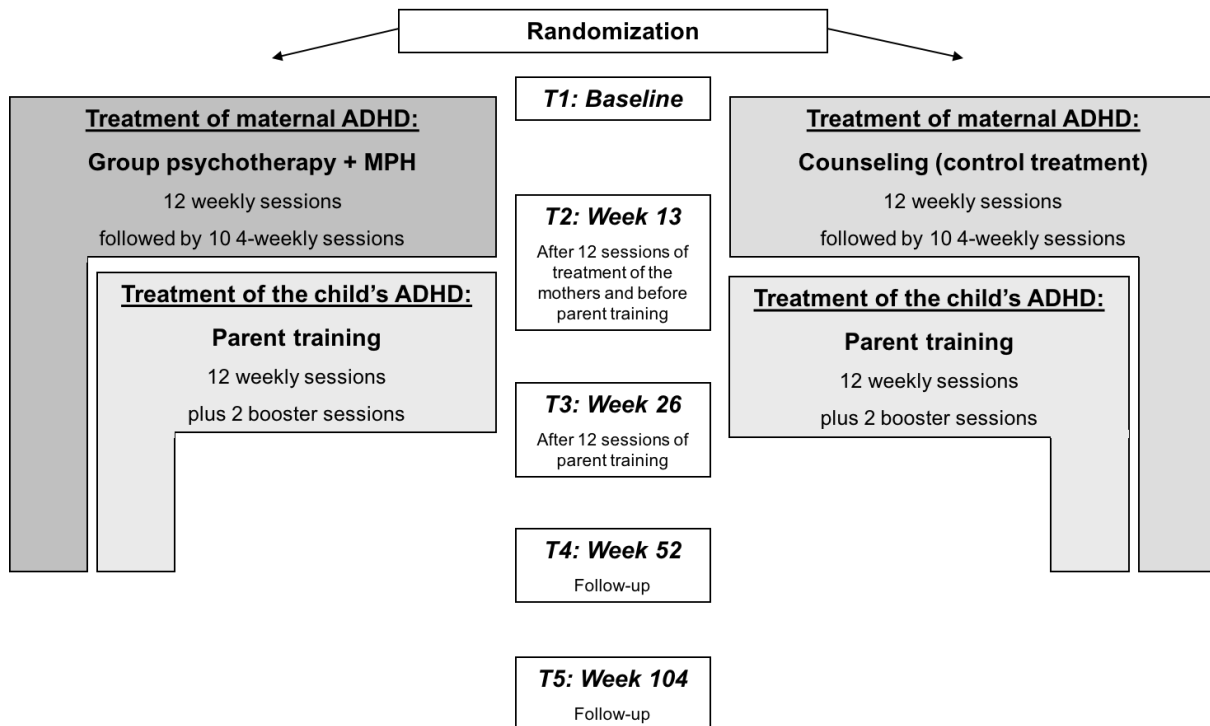

**Figure S1.** Study design of the AIMAC study (ADHD in Mothers and Children) including treatment of the mother and parent-child training for treatment group and control group families. Adapted from “Does the treatment of maternal attention deficit and hyperactivity disorder (ADHD) enhance the efficacy of a behavioural parent training for the treatment of their children’s ADHD? Study protocol of a randomized controlled multicentre trial,” by T. Jans, A. Philipsen, E. Graf, G. Ihorst, M. Gerlach, and A. Warnke. 2009, *Attention Deficit and Hyperactivity Disorders, 1*, p. 36. Copyright by Springer Vienna.

Control group

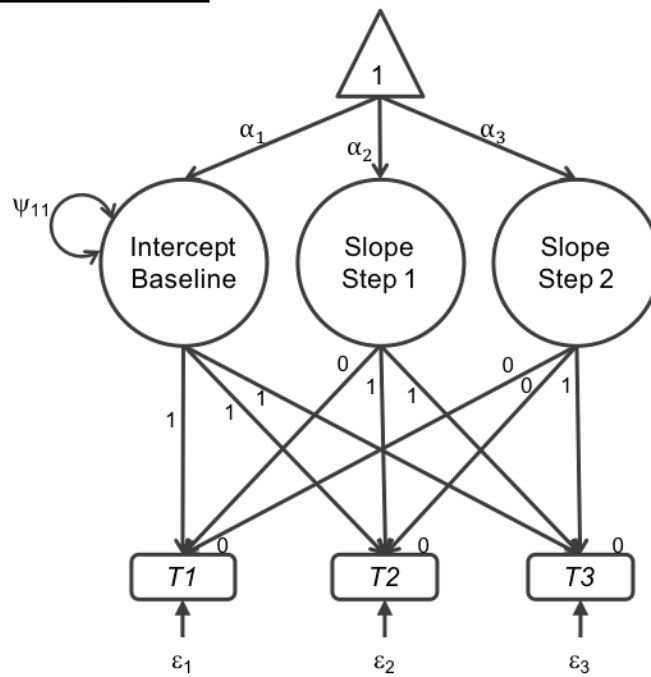

Treatment group

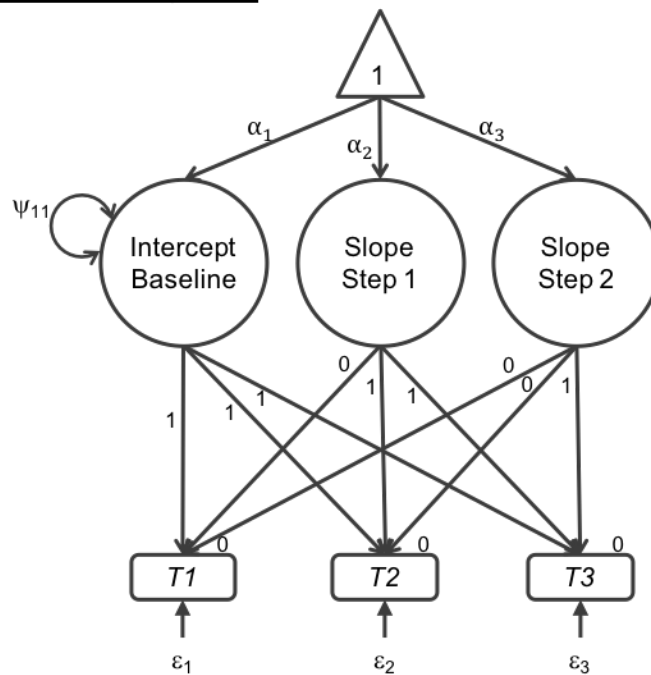

**Figure S2.** Multi-group analysis of piecewise latent growth curve models.  $\psi_{11}$  = variance latent intercept factor representing interindividual variation at baseline;  $\alpha_1$  = mean latent intercept factor indicating average value at baseline;  $\alpha_2$  = mean latent slope factor for Step 1 representing average change during treatment of the mother;  $\alpha_3$  = mean latent slope factor for Step 2 indicating average change during parent-child training; T1 = baseline assessment; T2 = assessment after Step 1 mother treatment and before Step 2 parent-child training; T3 = assessment after Step 2 parent-child training;  $\epsilon_1$ – $\epsilon_3$  = error terms of the respective assessment points.

**Table S1.** Descriptive statistics of outcome measures before and after Step 1 (T1 to T2) mother treatment and Step 2 (T2 to T3) parent-child training

| Outcome & informant       | Control group |          |               |          |               |          | Treatment group |          |          |               |          |               |          |               |
|---------------------------|---------------|----------|---------------|----------|---------------|----------|-----------------|----------|----------|---------------|----------|---------------|----------|---------------|
|                           | <i>n</i>      | <i>M</i> | ( <i>SD</i> ) | <i>M</i> | ( <i>SD</i> ) | <i>M</i> | ( <i>SD</i> )   | <i>n</i> | <i>M</i> | ( <i>SD</i> ) | <i>M</i> | ( <i>SD</i> ) | <i>M</i> | ( <i>SD</i> ) |
| Child outcome             |               |          |               |          |               |          |                 |          |          |               |          |               |          |               |
| K-SADS blinded clinician  |               |          |               |          |               |          |                 |          |          |               |          |               |          |               |
| Inattention               | 66            | 5.89     | (1.97)        | 4.72     | (2.03)        | 3.76     | (2.17)          | 77       | 5.86     | (2.45)        | 4.78     | (2.35)        | 3.93     | (2.49)        |
| Hyp/Imp                   | 66            | 5.30     | (2.41)        | 4.76     | (2.22)        | 3.77     | (2.16)          | 77       | 5.25     | (2.45)        | 5.08     | (2.42)        | 4.25     | (2.67)        |
| ODD                       | 66            | 3.70     | (1.95)        | 3.60     | (2.01)        | 2.33     | (1.92)          | 77       | 3.65     | (2.15)        | 3.32     | (2.16)        | 2.93     | (2.01)        |
| SDQ mother                |               |          |               |          |               |          |                 |          |          |               |          |               |          |               |
| Hyperactivity             | 66            | 7.20     | (1.94)        | 6.63     | (1.93)        | 6.21     | (2.01)          | 77       | 7.24     | (1.77)        | 6.61     | (1.98)        | 5.92     | (2.43)        |
| Conduct                   | 66            | 3.80     | (2.10)        | 3.97     | (2.01)        | 3.27     | (1.75)          | 77       | 4.31     | (2.06)        | 3.91     | (1.66)        | 3.38     | (1.96)        |
| Emotional                 | 66            | 3.73     | (2.51)        | 3.57     | (2.34)        | 2.72     | (2.18)          | 77       | 4.04     | (2.19)        | 4.00     | (2.25)        | 3.26     | (2.18)        |
| HSQ mother                |               |          |               |          |               |          |                 |          |          |               |          |               |          |               |
| Total                     | 66            | 50.19    | (26.20)       | 46.54    | (25.98)       | 37.64    | (23.62)         | 77       | 56.21    | (25.87)       | 51.32    | (27.22)       | 40.44    | (23.01)       |
| FIQ mother                |               |          |               |          |               |          |                 |          |          |               |          |               |          |               |
| Social                    | 66            | 0.93     | (0.55)        | 0.88     | (0.52)        | 0.80     | (0.56)          | 77       | 1.15     | (0.60)        | 1.04     | (0.65)        | 0.92     | (0.57)        |
| Negative                  | 65            | 1.54     | (0.54)        | 1.47     | (0.54)        | 1.27     | (0.55)          | 76       | 1.50     | (0.51)        | 1.47     | (0.58)        | 1.27     | (0.57)        |
| Positive                  | 65            | 0.98     | (0.58)        | 0.95     | (0.60)        | 0.97     | (0.57)          | 76       | 0.98     | (0.55)        | 1.04     | (0.68)        | 1.08     | (0.63)        |
| SDQ teacher               |               |          |               |          |               |          |                 |          |          |               |          |               |          |               |
| Hyperactivity             | 57            | 5.05     | (2.74)        | 4.53     | (2.46)        | 4.46     | (2.32)          | 65       | 5.03     | (2.93)        | 4.49     | (2.41)        | 4.52     | (2.82)        |
| Conduct                   | 57            | 2.12     | (2.27)        | 1.93     | (1.94)        | 1.61     | (1.66)          | 65       | 2.51     | (2.38)        | 1.99     | (1.69)        | 1.47     | (1.48)        |
| Emotional                 | 57            | 2.22     | (2.46)        | 2.00     | (2.30)        | 1.45     | (1.81)          | 65       | 2.48     | (2.27)        | 2.39     | (1.89)        | 2.22     | (1.86)        |
| Mother outcome            |               |          |               |          |               |          |                 |          |          |               |          |               |          |               |
| CAARS–O blinded clinician |               |          |               |          |               |          |                 |          |          |               |          |               |          |               |
| Inattention               | 66            | 17.57    | (7.19)        | 16.31    | (7.40)        | 15.19    | (8.32)          | 76       | 18.29    | (7.00)        | 13.87    | (7.53)        | 11.86    | (6.84)        |
| Hyperactivity             | 66            | 17.12    | (7.82)        | 15.00    | (7.29)        | 14.12    | (6.68)          | 76       | 16.68    | (6.06)        | 13.26    | (7.11)        | 11.67    | (6.53)        |
| Impulsivity               | 66            | 19.26    | (7.33)        | 16.68    | (6.49)        | 15.28    | (7.50)          | 76       | 18.23    | (7.51)        | 13.85    | (6.11)        | 11.97    | (6.16)        |
| CAARS–S mother            |               |          |               |          |               |          |                 |          |          |               |          |               |          |               |
| Inattention               | 65            | 17.36    | (7.85)        | 15.87    | (8.31)        | 14.96    | (8.41)          | 75       | 18.44    | (7.34)        | 13.88    | (7.27)        | 11.98    | (6.65)        |
| Hyperactivity             | 65            | 16.37    | (7.05)        | 14.15    | (6.60)        | 13.06    | (6.08)          | 75       | 16.17    | (6.64)        | 12.28    | (6.42)        | 10.80    | (6.02)        |
| Impulsivity               | 65            | 19.26    | (7.49)        | 17.40    | (7.63)        | 15.52    | (8.22)          | 75       | 18.63    | (7.74)        | 13.89    | (6.49)        | 12.17    | (6.48)        |

*Note.* Missing data were handled by FIML. For a person to be considered for analysis, at least one assessment per variable was required. *n* = available sample size for analysis; T1 = baseline assessment; T2 = assessment after Step 1 mother treatment and before Step 2 parent-child training; T3 = assessment after Step 2 parent-child training; K-SADS = Kiddie-Sads-Present and Lifetime Version with the scales Inattention, Hyperactivity/Impulsivity and Oppositional Defiant Disorder; SDQ = Strengths and Difficulties Questionnaire with the scales Hyperactivity, Conduct Problems and Emotional Symptoms; HSQ = Home Situation Questionnaire; FIQ = Family Impact Questionnaire with the scales Impact on Social Life, Positive Feelings Toward Child and Negative Feelings Toward Child; CAARS–O = Conners’ Adult ADHD Rating Scales–Observer:

Long Version with the scales Inattention and Memory Problems, Hyperactivity/Restlessness and Impulsivity/Emotional Lability; CAARS-S = Conners' Adult ADHD Rating Scales-Self Report: Long Version with scales analogous to CAARS-O.

**Table S2.** Results of the final multi-group analysis of piecewise linear latent growth models for unstandardized variables

| Outcome & informant       | df | $\chi^2$ | p    | CFI  | Control group     |                   |                   | Treatment group   |                   |                   | Source of misfit |
|---------------------------|----|----------|------|------|-------------------|-------------------|-------------------|-------------------|-------------------|-------------------|------------------|
|                           |    |          |      |      | $\alpha_1^{(CG)}$ | $\alpha_2^{(CG)}$ | $\alpha_3^{(CG)}$ | $\alpha_1^{(TG)}$ | $\alpha_2^{(TG)}$ | $\alpha_3^{(TG)}$ |                  |
| Child outcome             |    |          |      |      |                   |                   |                   |                   |                   |                   |                  |
| K-SADS blinded clinician  |    |          |      |      |                   |                   |                   |                   |                   |                   |                  |
| Inattention               | 8  | 1.29     | 1.00 | 1.00 | 5.85*             | -1.03*            | -1.03*            | 5.85*             | -1.03*            | -1.03*            |                  |
| Hyp/Imp                   | 8  | 8.64     | .37  | .99  | 5.36*             | -0.62*            | -0.62*            | 5.36*             | -0.62*            | -0.62*            |                  |
| ODD                       | 7  | 4.80     | .68  | 1.00 | 3.72*             | -0.34*            | -1.11*            | 3.72*             | -0.34*            | -0.34*            |                  |
| SDQ mother                |    |          |      |      |                   |                   |                   |                   |                   |                   |                  |
| Hyperactivity             | 8  | 12.29    | .14  | .96  | 7.23*             | -0.61*            | -0.61*            | 7.23*             | -0.61*            | -0.61*            | TG               |
| Conduct                   | 7  | 17.40    | .01  | .93  | 4.15*             | -0.10             | -0.47*            | 4.15*             | -0.47*            | -0.47*            | TG               |
| Emotional                 | 8  | 16.60    | .03  | .93  | 3.99*             | -0.44*            | -0.44*            | 3.99*             | -0.44*            | -0.44*            | CG               |
| HSQ mother                |    |          |      |      |                   |                   |                   |                   |                   |                   |                  |
| Total                     | 8  | 13.80    | .09  | .95  | 54.42*            | -7.03*            | -7.03*            | 54.42*            | -7.03*            | -7.03*            |                  |
| FIQ mother                |    |          |      |      |                   |                   |                   |                   |                   |                   |                  |
| Social                    | 7  | 7.81     | .35  | 1.00 | 0.95*             | -0.09*            | -0.09*            | 1.13*             | -0.09*            | -0.09*            |                  |
| Negative                  | 8  | 10.59    | .23  | .98  | 1.53*             | -0.11*            | -0.11*            | 1.53*             | -0.11*            | -0.11*            |                  |
| Positive                  | 8  | 6.34     | .61  | 1.00 | 0.98*             | 0.02              | 0.02              | 0.98*             | 0.02              | 0.02              |                  |
| SDQ teacher               |    |          |      |      |                   |                   |                   |                   |                   |                   |                  |
| Hyperactivity             | 8  | 4.94     | .76  | 1.00 | 4.95*             | -0.30*            | -0.30*            | 4.95*             | -0.30*            | -0.30*            |                  |
| Conduct                   | 8  | 15.56    | .05  | .89  | 2.29*             | -0.34*            | -0.34*            | 2.29*             | -0.34*            | -0.34*            | TG               |
| Emotional                 | 8  | 5.60     | .69  | 1.00 | 2.47*             | -0.29*            | -0.29*            | 2.47*             | -0.29*            | -0.29*            |                  |
| Mother outcome            |    |          |      |      |                   |                   |                   |                   |                   |                   |                  |
| CAARS-O blinded clinician |    |          |      |      |                   |                   |                   |                   |                   |                   |                  |
| Inattention               | 7  | 14.34    | .05  | .96  | 18.05*            | -1.51*            | -1.51*            | 18.05*            | -4.63*            | -1.51*            | TG               |
| Hyperactivity             | 7  | 25.13    | .00  | .88  | 16.54*            | -1.48*            | -1.48*            | 16.54*            | -2.51*            | -2.51*            | TG               |
| Impulsivity               | 7  | 6.07     | .53  | 1.00 | 18.58*            | -1.86*            | -1.86*            | 18.58*            | -4.60*            | -1.86*            |                  |
| CAARS-S mother            |    |          |      |      |                   |                   |                   |                   |                   |                   |                  |
| Inattention               | 7  | 5.48     | .60  | 1.00 | 17.99*            | -1.46*            | -1.46*            | 17.99*            | -4.61*            | -1.46*            |                  |
| Hyperactivity             | 7  | 7.54     | .37  | 1.00 | 16.15*            | -1.66*            | -1.66*            | 16.15*            | -3.81*            | -1.66*            |                  |
| Impulsivity               | 7  | 2.00     | .96  | 1.00 | 18.92*            | -1.79*            | -1.79*            | 18.92*            | -4.86*            | -1.79*            |                  |

*Note.* Results concern the final model of a series of nested piecewise linear latent growth models (within- and between-group analysis). *df* = degrees of freedom;  $\chi^2$  = chi-square value; *CFI* = comparative fit index;  $\alpha_1^{(CG)}$  = mean of latent intercept factor indicating average outcome in CG at baseline (T1);  $\alpha_2^{(CG)}$  = mean of latent slope factor representing average change in CG during Step 1 (T1 to T2);  $\alpha_3^{(CG)}$  = mean of latent slope factor indicating average change in CG during Step 2

(T2 to T3);  $\alpha_1^{(TG)}$  = mean of latent intercept factor indicating average outcome in TG at baseline (T1);  $\alpha_2^{(TG)}$  = mean of latent slope factor representing average change in TG during Step 1 (T1 to T2);  $\alpha_3^{(TG)}$  = mean of latent slope factor indicating average change in TG during Step 2 (T2 to T3); misfit = indicates intervention group (CG, TG) with one or both criteria of model fit not fulfilled ( $\chi^2$  test  $p > .05$ ;  $CFI > .90$ ) in single-group analysis (within-group analysis); K-SADS = Kiddie-Sads-Present and Lifetime Version with the scales Inattention, Hyperactivity/Impulsivity and Oppositional Defiant Disorder; SDQ = Strengths and Difficulties Questionnaire with the scales Hyperactivity, Conduct Problems and Emotional Symptoms; HSQ = Home Situation Questionnaire; FIQ = Family Impact Questionnaire with the scales Impact on Social Life, Positive Feelings Toward Child and Negative Feelings Toward Child; CAARS-O = Conners' Adult ADHD Rating Scales-Observer: Long Version with the scales Inattention and Memory Problems, Hyperactivity/Restlessness and Impulsivity/Emotional Lability; CAARS-S = Conners' Adult ADHD Rating Scales-Self Report: Long Version with scales analogous to CAARS-O; TG = treatment group; CG = control group.

\*  $p < .05$ .
